# Supplementary material for: In vivo validation of the adequacy calculator for continuous renal replacement therapies
Source: Springer Nature journal article supplement (doi:10.1186/cc3517), 2005-04-07
Supplement: Additional file 1 [file cc3517-s1.pdf]

## **Additional file 1**

### CVVH POSTDILUTION

*Estimated urea clearance ( $K_{CALC}$ ):*

$$K_{CALC} = Q_{uf}$$

*Delivered urea clearance ( $K_{DEL}$ ):*

$$K_{DEL} = C_{uf} * Q_{uf} / C_{bi}$$

Where,  $C_{uf}$  = ultrafiltrate urea level (mg/dl).

$Q_{uf}$  = ultrafiltration rate (ml/min).

$C_{bi}$  = prefilter urea level (mg/dl).

### CVVH PREDILUTION

*Estimated urea clearance ( $K_{CALC}$ ):*

$$K_{CALC} = Q_{uf} / [1 + (Q_r / Q_b)]$$

*Delivered urea clearance ( $K_{DEL}$ ):*

$$K_{DEL} = C_{uf} * Q_{uf} / C_{bi}$$

Where,  $Q_r$  = predilution fluid replacement rate (ml/min).

$Q_b$  = blood flow rate (ml/min).

### CVVHD

*Estimated urea clearance ( $K_{CALC}$ ):*

$$K_{CALC} = Q_{do}$$

*Delivered urea clearance ( $K_{DEL}$ ):*

$$K_{DEL} = C_{do} * Q_{do} / C_{bi}$$

Where,  $C_{do}$  = dialysate outflow urea nitrogen level (ml/min).

$Q_{do}$  = dialysate outflow rate (ml/min).

$C_{bi}$  = prefilter urea level (mg/dl).

### CVVHDF POSTDILUTION

*Estimated urea clearance ( $K_{CALC}$ ):*

$$K_{CALC} = Q_{uf} + Q_{do}$$

*Delivered urea clearance ( $K_{DEL}$ ):*

$$K_{DEL} = C_{uf-do} * (Q_{uf} + Q_{do}) / C_{bi}$$

Where,  $C_{uf-do}$  = ultrafiltrate outflow urea level (mg/dl).

### UREA VOLUME OF DISTRIBUTION

V (L): patient's body weight (Kg) \* 0.6

### FRACTIONAL CLEARANCE:

$SpKt/V_{CALC}$ :  $K_{CALC}$  (ml/min)\*prescribed treatment time (min)/V (ml)

$SpKt/V_{DEL}$ :  $K_{DEL}$  (ml/min)\*operative treatment time (min)/V (ml)
